# Supplementary material for: Dietary and Activity Factors Influence Poor Sleep and the Sleep-Obesity Nexus among Children
Source: MDPI journal article supplement (doi:10.3390/ijerph16101778), 2019-05-20

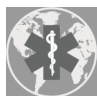

Supplementary Material

# Dietary and Activity Factors Influence Poor Sleep and the Sleep-Obesity Nexus among Children

Bridget Morrissey, Steven Allender and Claudia Strugnell

Table S1. Data management: outline of variables and coding modifications.

|                 | Variable                 | Original Coding                                                                                                                                                   | New Or Recoded Variable                                                                                                                                                 | Further recoding                                                                                                                                                         |
|-----------------|--------------------------|-------------------------------------------------------------------------------------------------------------------------------------------------------------------|-------------------------------------------------------------------------------------------------------------------------------------------------------------------------|--------------------------------------------------------------------------------------------------------------------------------------------------------------------------|
| Weight Status   | Categorical BMI z-scores | <b>Weight Status: four categories:</b><br>-1 Thinness (BMI <-2SD)<br>0 Normal weight (BMI ≥-2SD & ≤1SD)<br>1 Overweight (BMI >1SD & ≤2SD)<br>2 Obesity (BMI >2SD) | <b>Weight Status three categories:</b><br>0 Normal weight (BMI <1SD)<br>1 Overweight (BMI ≥1SD, <2SD)<br>2 Obesity (BMI ≥2SD)                                           | <b>Weight Status two categories:</b><br>0 Normal weight (BMI <1SD)<br>1 Overweight (BMI ≥1SD)                                                                            |
| Sleep Variables | Sleep duration           | <b>There categories:</b><br>1 <9 hours (short)<br>2 ≥9-<11 hours (sufficient)<br>3 11 or more hours (long)                                                        | <b>Two categories:</b><br>1 <9 hours (short)<br>2 ≥9 hours (sufficient)                                                                                                 | <b>Poor duration</b><br>0 YES (<9 hours)<br>1 NO (≥9 hours)                                                                                                              |
|                 | Sleep timing             | <b>Bed time</b><br>1. Early to bed ≤ 20:15<br>2. Late to bed ≥20:30<br><b>Wake time</b><br>1. Early to rise ≤7:00<br>2. Late to rise ≥7:15                        | <b>Sleep-wake timing categories</b><br>1 Early To Bed / Early To Rise<br>2 Early To Bed / Late To Rise<br>3 Late To Bed / Early To Rise<br>4 Late To Bed / Late To Rise | <b>Poor bed time</b><br>0 YES (Late to bed ≥20:30)<br>1 NO (Early to bed ≤ 20:15)<br><b>Poor wake time</b><br>0. YES (Early to rise ≤7:00)<br>1. NO (Late to rise ≥7:15) |
|                 | Sleep quality            | <b>How well sleep</b><br>0 Very Good<br>1 Fairly Good<br>2 Average<br>3 Fairly Bad<br>4 Very Bad                                                                  | <b>Three categories (reversed)</b><br>1 Bad/very bad<br>2 Average<br>3 Good                                                                                             | <b>Poor sleep quality</b><br>0 YES (bad/very bad)<br>1 NO (good/average)                                                                                                 |

|                           |                             |                                                                                                                                                                                                                          |                                                                                                                                                                                                                                      |                                                                                                                            |
|---------------------------|-----------------------------|--------------------------------------------------------------------------------------------------------------------------------------------------------------------------------------------------------------------------|--------------------------------------------------------------------------------------------------------------------------------------------------------------------------------------------------------------------------------------|----------------------------------------------------------------------------------------------------------------------------|
|                           | <b>Sleep initiation</b>     | <b>Problem falling asleep (&gt;20 mins)</b><br>0 Never >20 (Good)<br>1 Almost never > 20min<br>2 Sometimes >20min<br>3 Often >20min<br>4 Almost always >20 min (bad)                                                     | <b>Three categories (reversed)</b><br>1 Bad/very bad<br>2 Average<br>3 Good                                                                                                                                                          | <b>Poor sleep initiation</b><br>0 YES (bad/very bad)<br>1 NO (good/average)                                                |
|                           | <b>Sleep maintenance</b>    | <b>How often wake up during the night</b><br>0 Never (I don't)<br>1 Almost never (every now and then)<br>2 Sometimes (at least once a night)<br>3 Often (3 times or more a night)<br>4 I don't know (CONVERT TO MISSING) | <b>Three categories</b><br>1 Never<br>2 Once or twice<br>3 Three or more                                                                                                                                                             | <b>Poor sleep maintenance</b><br>0 YES ( $\geq 3$ wake episodes)<br>1 NO ( $< 3$ wake episodes)                            |
|                           | <b>Sleep score</b>          | <b>Row total:</b><br>Poor duration, poor bed time, poor wake time, poor sleep quality, poor sleep initiation, and poor sleep maintenance (Range 0-6)                                                                     | <b>Sleep score four categories</b><br>0 No sleep problem<br>1 One sleep problem<br>2 Two sleep problems<br>3 Three sleep problems<br>4 $\geq$ Four sleep problems                                                                    | <b>Sleep score three categories</b><br>0 $\leq$ One sleep problem<br>1 Two sleep problems<br>2 $\geq$ Three sleep problems |
| <b>Dietary Behaviours</b> | <b>Fruit Guidelines</b>     | <b>Reported average number of serves per day</b><br>15 total options for number of serves<br>0.5 serve increments<br>Range from 0 serves to 7 serves per day                                                             | <b>Met recommended daily serves guidelines</b><br>0 No ( $< 2$ serves)<br>1 Yes ( $\geq 2$ serves)                                                                                                                                   |                                                                                                                            |
|                           | <b>Vegetable guidelines</b> | <b>Reported average number of serves per day</b><br>15 total options for number of serves<br>0.5 serve increments<br>Range from 0 serves to 7 serves per day                                                             | <b>Met recommended daily serves guidelines</b><br><b>Boys aged 12years+:</b><br>0 No ( $< 5.5$ serves)<br>1 Yes ( $\geq 5.5$ serves)<br><b>All girls and boys &lt; 12 years:</b><br>0 No ( $< 5$ serves)<br>1 Yes ( $\geq 5$ serves) |                                                                                                                            |

|                                     |                                                   |                                                                                                                                                                                                                |                                                                                                                                                           |                                                                                                                                    |
|-------------------------------------|---------------------------------------------------|----------------------------------------------------------------------------------------------------------------------------------------------------------------------------------------------------------------|-----------------------------------------------------------------------------------------------------------------------------------------------------------|------------------------------------------------------------------------------------------------------------------------------------|
|                                     | <b>Takeaway consumption</b>                       | <b>Average takeaway consumption as a meal</b><br>1 Every meal<br>2 More than once a day<br>3 Every day<br>4 Almost every day<br>5 2-4 times a week<br>6 Once a week<br>7 Once a fortnight<br>8 Rarely or never | <b>Four categories (reversed)</b><br>0 Once a week or less<br>1 2-4 times a week<br>2 Every day/almost every day<br>3 More than once a                    | <b>Two Categories</b><br>0 Once a week or less<br>1 2 times or more                                                                |
|                                     | <b>Sugar sweetened beverage (SSB) consumption</b> | <b>Average SSB consumption</b><br>1 3 or more times per day<br>2 2 times per day<br>3 1 time per day<br>4 Almost every day<br>5 Every second day<br>6 Once a week<br>7 Once a fortnight<br>8 Rarely or never   | <b>Four categories (reversed)</b><br>0 Once a week or less<br>1 Almost every day/<br>every second day<br>2 1-2 times per day<br>3 3 or more times per day |                                                                                                                                    |
|                                     | <b>Sugar sweetened beverage before bed</b>        | <b>How often drink SSB before bed</b><br>0 Never<br>1 Almost never<br>2 Sometimes<br>3 Often<br>4 Almost always                                                                                                | <b>Two categories</b><br>0 Never/sometimes<br>1 Often/almost always                                                                                       |                                                                                                                                    |
|                                     | <b>Snack consumption</b>                          | <b>Average snack consumption</b><br>1 3 or more times per day<br>2 2 times per day<br>3 1 time per day<br>4 Almost every day<br>5 Every second day<br>6 Once a week<br>7 Once a fortnight<br>8 Rarely or never | <b>Four categories (reversed)</b><br>0 Once a week or less<br>1 Almost every day/<br>every second day<br>2 1-2 times per day<br>3 3 or more times per day | <b>Two Categories</b><br>0 Once a day or less<br>1 Twice or more per day                                                           |
| <b>Physical Activity Behaviours</b> | <b>Physical activity (PA) Guidelines</b>          | <b>Meeting daily PA guidelines (separate for each day of the week)</b><br>0 Guidelines not met (<1 hour)                                                                                                       | <b>Meeting PA guidelines (for all seven days)</b><br>0 < 7 days with $\geq 1$ hour PA<br>1 7 days with $\geq 1$ hour PA                                   | <b>Meeting PA guidelines (for five of seven days)</b><br>0 < 5 days with $\geq 1$ hour PA<br>1 $\geq 5$ days with $\geq 1$ hour PA |

|                                      |                                                   |                                                                                                                                                                                                         |                                                                                                                                                                                                           |                                                                                                                                                                                                                |
|--------------------------------------|---------------------------------------------------|---------------------------------------------------------------------------------------------------------------------------------------------------------------------------------------------------------|-----------------------------------------------------------------------------------------------------------------------------------------------------------------------------------------------------------|----------------------------------------------------------------------------------------------------------------------------------------------------------------------------------------------------------------|
|                                      |                                                   | <p><b>1</b> Guidelines met (<math>\geq 1</math> hour)</p>                                                                                                                                               |                                                                                                                                                                                                           |                                                                                                                                                                                                                |
|                                      | <p><b>Physically active 1 hour before bed</b></p> | <p><b>How often physically active 1 hour before bed</b></p> <p><b>0</b> Never</p> <p><b>1</b> Almost never</p> <p><b>2</b> Sometimes</p> <p><b>3</b> Often</p> <p><b>4</b> Almost always</p>            | <p><b>Two categories</b></p> <p><b>0</b> Never/sometimes</p> <p><b>1</b> Often/almost always</p>                                                                                                          |                                                                                                                                                                                                                |
| <p><b>Screen Time Behaviours</b></p> | <p><b>Screen time (ST) guidelines</b></p>         | <p><b>Meeting daily ST guidelines (separate for each day of the week)</b></p> <p><b>0</b> Guidelines not met (<math>&gt; 2</math> hours)</p> <p><b>1</b> Guidelines met (<math>\leq 2</math> hours)</p> | <p><b>Meeting ST guidelines (for all seven days)</b></p> <p><b>0</b> <math>&lt; 7</math> days with <math>\leq 2</math> hours ST</p> <p><b>1</b> <math>7</math> days with <math>\leq 2</math> hours ST</p> | <p><b>Meeting ST guidelines (for all seven days)</b></p> <p><b>0</b> <math>&lt; 5</math> days with <math>\leq 2</math> hours ST</p> <p><b>1</b> <math>\geq 5</math> days with <math>\leq 2</math> hours ST</p> |
|                                      | <p><b>Screen time 1 hour before bed</b></p>       | <p><b>How use screen device 1 hour before bed</b></p> <p><b>0</b> Never</p> <p><b>1</b> Almost never</p> <p><b>2</b> Sometimes</p> <p><b>3</b> Often</p> <p><b>4</b> Almost always</p>                  | <p><b>Two categories</b></p> <p><b>0</b> Never/sometimes</p> <p><b>1</b> Often/almost always</p>                                                                                                          |                                                                                                                                                                                                                |
|                                      | <p><b>Screen time in bed</b></p>                  | <p><b>How often use screen device while in bed</b></p> <p><b>0</b> Never</p> <p><b>1</b> Almost never</p> <p><b>2</b> Sometimes</p> <p><b>3</b> Often</p> <p><b>4</b> Almost always</p>                 | <p><b>Two categories</b></p> <p><b>0</b> Never/sometimes</p> <p><b>1</b> Often/almost always</p>                                                                                                          |                                                                                                                                                                                                                |

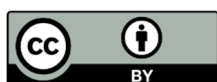

Supplement: s1 [file s1]
